# Supplementary material for: Ferracyclic carbamoyl complexes related to the active site of [Fe]-hydrogenase
Source: Royal Society of Chemistry journal article supplement (doi:10.1039/c3dt50642h), 2013-01-01
Supplement: c3dt50642h.pdf [file c3dt50642h.pdf]

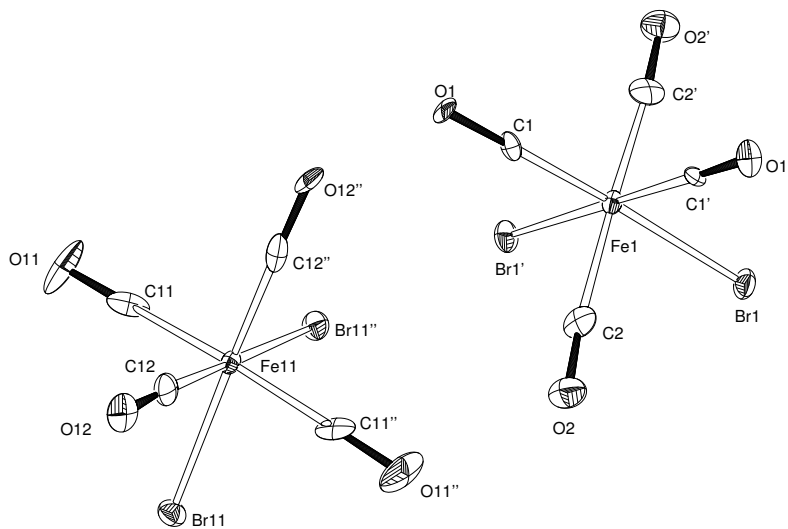

Figure S1: ORTEP representation of one of the two independent molecules of  $\text{Fe}(\text{CO})_4\text{Br}_2$  in the unit cell showing 50 % probability ellipsoids.

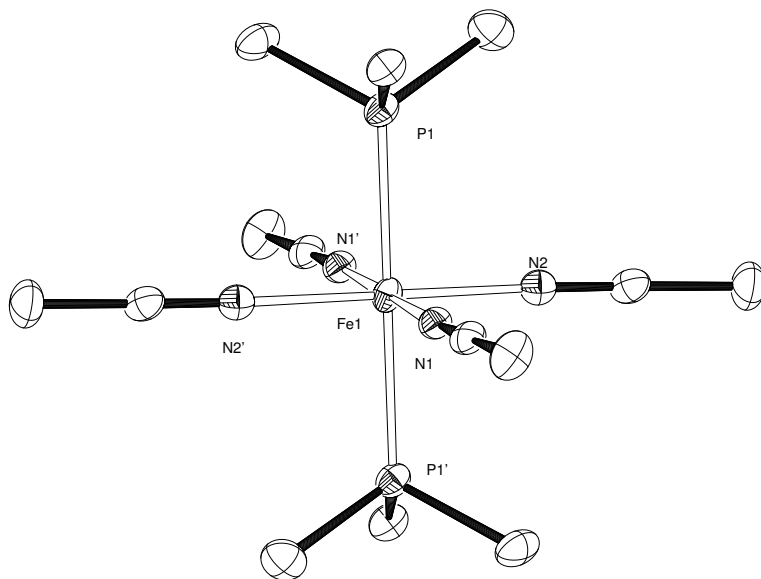

Figure S2: ORTEP representation of cation of  $[\text{Fe}(\text{MeCN})_4(\text{PMe}_3)_2][(\text{Br}_3\text{Fe})_2\text{O}]$  showing 50 % probability ellipsoids; hydrogen atoms have been omitted for clarity.

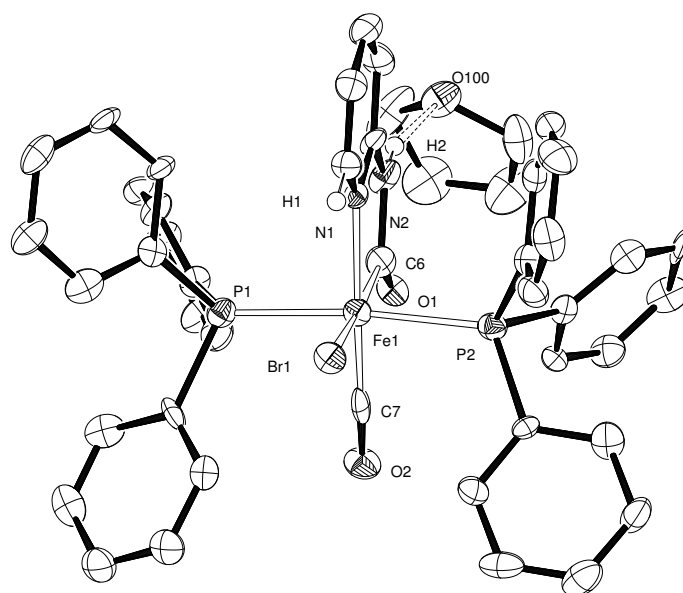

Figure S3: ORTEP representation of structure of  $\text{Fe}(\text{CO})(\text{PPh}_3)_2(\text{Br})(\text{C}_6\text{H}_5\text{N}_2\text{CO}) \cdot \text{THF}$  showing 50% probability ellipsoids; hydrogen atoms except for H(2) have been omitted for clarity.

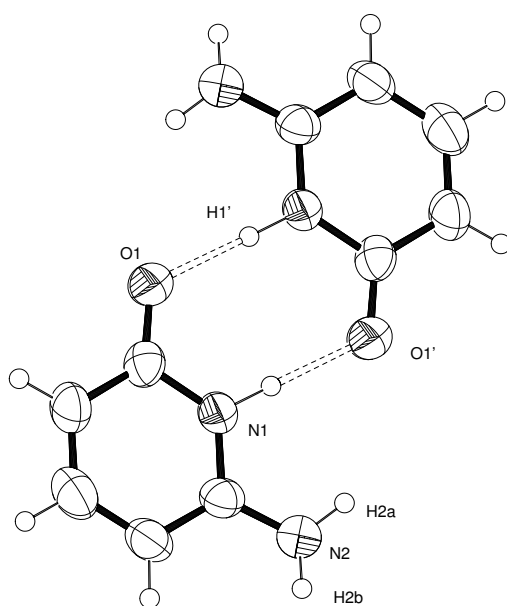

Figure S4: ORTEP representation of the a dimer of one of the two independent molecules of **4a'** · H<sub>2</sub>O showing 50 % probability ellipsoids; the hydrogen-bonded water molecule has been omitted for clarity.

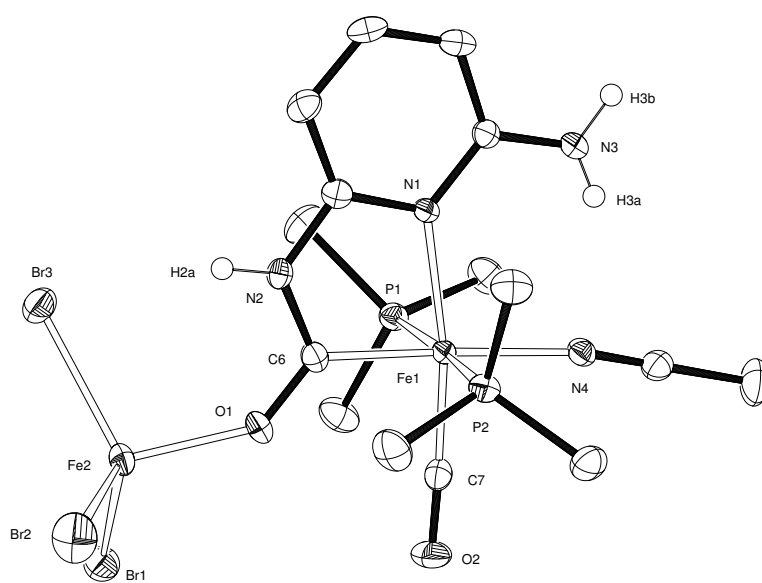

Figure S5: ORTEP representation of structure of  $\text{Fe}(\text{CO})(\text{PMe}_3)_2\text{C}_6\text{H}_6\text{N}_3\text{CO}(\text{FeBr}_3)(\text{MeCN})$  showing 50% probability ellipsoids; hydrogen atoms except for those on nitrogen have been omitted for clarity.

Table S1: Summary of crystallographic data for supporting structures

|                                                             | [Fe(MeCN) <sub>4</sub> (PMe <sub>3</sub> ) <sub>2</sub> ](Br <sub>3</sub> Fe <sub>2</sub> O)      | Fe(CO)(PPh <sub>3</sub> ) <sub>2</sub> (Br)(C <sub>6</sub> H <sub>5</sub> N <sub>2</sub> CO) · THF               | 4a                                                                                | Fe(CO)(PMe <sub>3</sub> ) <sub>2</sub> {C <sub>6</sub> H <sub>6</sub> N <sub>3</sub> CO(FeBr <sub>3</sub> )}(MeCN) |
|-------------------------------------------------------------|---------------------------------------------------------------------------------------------------|------------------------------------------------------------------------------------------------------------------|-----------------------------------------------------------------------------------|--------------------------------------------------------------------------------------------------------------------|
| Formula                                                     | C <sub>14</sub> H <sub>30</sub> FeN <sub>4</sub> P <sub>2</sub> Br <sub>6</sub> Fe <sub>2</sub> O | C <sub>43</sub> H <sub>35</sub> BrFeN <sub>2</sub> O <sub>2</sub> P <sub>2</sub> C <sub>4</sub> H <sub>8</sub> O | C <sub>3</sub> H <sub>6</sub> N <sub>2</sub> O <sub>4</sub> · 5(H <sub>2</sub> O) | C <sub>15</sub> H <sub>27</sub> Br <sub>3</sub> Fe <sub>2</sub> N <sub>4</sub> O <sub>2</sub> P <sub>2</sub>       |
| <i>M</i>                                                    | 979.37                                                                                            | 881.53                                                                                                           | 119.13                                                                            | 708.78                                                                                                             |
| Space group                                                 | <i>P</i> 2 <sub>1</sub> / <i>c</i>                                                                | <i>P</i> $\bar{1}$                                                                                               | <i>P</i> $\bar{1}$                                                                | <i>P</i> 2 <sub>1</sub> / <i>n</i>                                                                                 |
| <i>a</i> /Å                                                 | 10.1505(3)                                                                                        | 11.061(5)                                                                                                        | 4.8603(6)                                                                         | 10.0743(3)                                                                                                         |
| <i>b</i> /Å                                                 | 12.4119(4)                                                                                        | 12.238(5)                                                                                                        | 9.3209(11)                                                                        | 13.2511(3)                                                                                                         |
| <i>c</i> /Å                                                 | 13.1800(4)                                                                                        | 15.979(5)                                                                                                        | 13.5944(19)                                                                       | 18.8476(5)                                                                                                         |
| $\alpha$ /°                                                 | 90                                                                                                | 69.894(5)                                                                                                        | 97.673(10)                                                                        | 90                                                                                                                 |
| $\beta$ /°                                                  | 110.162(2)                                                                                        | 86.657(5)                                                                                                        | 92.141(10)                                                                        | 92.460(2)                                                                                                          |
| $\gamma$ /°                                                 | 90                                                                                                | 77.321(5)                                                                                                        | 609.59(13)                                                                        | 90                                                                                                                 |
| <i>V</i> /Å <sup>3</sup>                                    | 1558.76(8)                                                                                        | 1981.3(14)                                                                                                       | 609.59(13)                                                                        | 2513.75(12)                                                                                                        |
| <i>T</i> /K                                                 | 120(2)                                                                                            | 120(2)                                                                                                           | 298(2)                                                                            | 140(2)                                                                                                             |
| <i>Z</i>                                                    | 2                                                                                                 | 2                                                                                                                | 4                                                                                 | 4                                                                                                                  |
| <i>R</i> <sub>int</sub>                                     | 0.045                                                                                             | 0.138                                                                                                            | 0.055                                                                             | 0.035                                                                                                              |
| <i>R</i> <sub>1</sub> [ <i>I</i> > 2σ <sub><i>I</i></sub> ] | 0.038                                                                                             | 0.089                                                                                                            | 0.054                                                                             | 0.026                                                                                                              |
| <i>wR</i> <sub>2</sub> [all data]                           | 0.079                                                                                             | 0.173                                                                                                            | 0.117                                                                             | 0.056                                                                                                              |
